# Supplementary material for: Learning Evaluation: blending quality improvement and implementation research methods to study healthcare innovations
Source: Springer Nature journal article supplement (doi:10.1186/s13012-015-0219-z), 2015-03-09
Supplement: MOESM3 [file 9772970]

**Appendix D: Process and outcome measures collected by ACT clinics**

| <b>Site ID</b> | <b>Process of care measures (Screening for behavioral and/or medical condition)</b> | <b>Patient outcome measures</b>                 |
|----------------|-------------------------------------------------------------------------------------|-------------------------------------------------|
| 1              | Cognitive screens                                                                   | Not measured                                    |
| 2              | Depression                                                                          | PHQ9 scores                                     |
| 3              | depression, anxiety, risky alcohol and substance use                                | PHQ9, GAD7, AUDIT, DAST scores                  |
| 4              | Depression                                                                          | PHQ9 scores                                     |
| 5              | unhealthy health behaviors                                                          | Not measured                                    |
| 6              | Depression, alcohol use, obesity, diabetes                                          | PHQ9, AUDIT scores, reductions in BMI and HbA1c |
| 7              | alcohol and substance use                                                           | DAST, AUDIT                                     |
| 8              | depression                                                                          | PHQ9                                            |
| 9              | Depression, Alcohol and tobacco use, safe at home                                   | PHQ9, AUDIT scores, smoking cessation           |
| 10             | Depression, anxiety, alcohol and tobacco use, diabetes                              | PHQ9 scores                                     |
| 11             | Substance use                                                                       | DAST, AUDIT                                     |
