# Supplementary material for: Learning Evaluation: blending quality improvement and implementation research methods to study healthcare innovations
Source: Springer Nature journal article supplement (doi:10.1186/s13012-015-0219-z), 2015-03-09
Supplement: MOESM4 [file 9772970]

### Appendix E: Example of a Patient Tracking Sheet

| Dummy ID                                                           | Medical Record Number                                                                                                                                 | Date of Visit | Date of Screening | Screen positive                                                                                          |                                                                                                       | Referral?                                                                                                                |                                                                                                                            |                                                                                                                           |                                                                                                                            | Intensive counseling?                                                                                                |                                                                                                           |                                                                                                           |                                                                                                                          | Follow up? |
|--------------------------------------------------------------------|-------------------------------------------------------------------------------------------------------------------------------------------------------|---------------|-------------------|----------------------------------------------------------------------------------------------------------|-------------------------------------------------------------------------------------------------------|--------------------------------------------------------------------------------------------------------------------------|----------------------------------------------------------------------------------------------------------------------------|---------------------------------------------------------------------------------------------------------------------------|----------------------------------------------------------------------------------------------------------------------------|----------------------------------------------------------------------------------------------------------------------|-----------------------------------------------------------------------------------------------------------|-----------------------------------------------------------------------------------------------------------|--------------------------------------------------------------------------------------------------------------------------|------------|
|                                                                    |                                                                                                                                                       |               |                   | What behavioral test did patient screen positive for?<br>1=PHQ9>4<br>2=AUDIT>8<br>3=Both<br>4=don't know | What medical test did patient screen positive for?<br>1=BMI≥30<br>2=HbA1c>7<br>3=Both<br>4=don't know | If this patient's screen was "positive" did the patient receive a traditional referral?<br>1=Yes<br>2=No<br>3=Don't know | If this patient's screen was "positive" did the patient receive a referral with outreach?<br>1=Yes<br>2=No<br>3=Don't know | If this patient's screen was "positive" did the patient receive a warm handoff referral?<br>1=Yes<br>2=No<br>3=Don't know | If this patient's screen was "positive" did the patient receive a staff or self-referral?<br>1=Yes<br>2=No<br>3=Don't know | If referred, did patient receive intensive counseling from primary care clinician?<br>1=Yes<br>2=No<br>3= Don't know | If referred, did patient receive intensive counseling from psychiatrist?<br>1=Yes<br>2=No<br>3=Don't know | If referred, did patient receive intensive counseling from health coach?<br>1=Yes<br>2=No<br>3=Don't know | If referred, did patient receive intensive counseling from behavioral health counselor?<br>1=Yes<br>2=No<br>3=Don't know |            |
| Please use the correct dummy ID for patients who screened positive | ! This column is for your records only. Please maintain a copy of this number. Please do not send files with medical record numbers or patient names. | 9/5/2013      | 8/28/2013         | 1                                                                                                        | 4                                                                                                     | 2                                                                                                                        | 2                                                                                                                          | 2                                                                                                                         | 1                                                                                                                          | 3                                                                                                                    | 2                                                                                                         | 2                                                                                                         | 2                                                                                                                        | 4          |
|                                                                    |                                                                                                                                                       | 9/19/2013     | 8/21/2013         | 1                                                                                                        | 4                                                                                                     | 2                                                                                                                        | 2                                                                                                                          | 2                                                                                                                         | 1                                                                                                                          | 3                                                                                                                    | 2                                                                                                         | 2                                                                                                         | 1                                                                                                                        | 2          |
|                                                                    |                                                                                                                                                       | 9/26/2013     | 9/20/2013         | 4                                                                                                        | 4                                                                                                     | 2                                                                                                                        | 2                                                                                                                          | 2                                                                                                                         | 1                                                                                                                          | 3                                                                                                                    | 2                                                                                                         | 2                                                                                                         | 1                                                                                                                        | 2          |
|                                                                    |                                                                                                                                                       | 9/26/2013     | 9/24/2013         | 1                                                                                                        | 4                                                                                                     | 2                                                                                                                        | 2                                                                                                                          | 2                                                                                                                         | 1                                                                                                                          | 3                                                                                                                    | 2                                                                                                         | 2                                                                                                         | 1                                                                                                                        | 2          |
|                                                                    |                                                                                                                                                       | 10/24/2013    | 10/15/2013        | 4                                                                                                        | 4                                                                                                     | 2                                                                                                                        | 2                                                                                                                          | 2                                                                                                                         | 1                                                                                                                          | 3                                                                                                                    | 2                                                                                                         | 2                                                                                                         | 1                                                                                                                        | 2          |
|                                                                    |                                                                                                                                                       | 10/24/2013    | 10/7/2013         | 1                                                                                                        | 4                                                                                                     | 2                                                                                                                        | 2                                                                                                                          | 2                                                                                                                         | 1                                                                                                                          | 1                                                                                                                    | 2                                                                                                         | 2                                                                                                         | 1                                                                                                                        | 2          |
|                                                                    |                                                                                                                                                       | 11/8/2013     | 10/17/2013        | 1                                                                                                        | 4                                                                                                     | 2                                                                                                                        | 2                                                                                                                          | 2                                                                                                                         | 1                                                                                                                          | 1                                                                                                                    | 2                                                                                                         | 2                                                                                                         | 1                                                                                                                        | 2          |
|                                                                    |                                                                                                                                                       | 11/11/2013    | 10/30/2013        | 4                                                                                                        | 4                                                                                                     | 2                                                                                                                        | 2                                                                                                                          | 2                                                                                                                         | 1                                                                                                                          | 3                                                                                                                    | 3                                                                                                         | 2                                                                                                         | 1                                                                                                                        | 2          |
|                                                                    |                                                                                                                                                       | 11/11/2013    | 11/18/2013        | 4                                                                                                        | 4                                                                                                     | 2                                                                                                                        | 2                                                                                                                          | 2                                                                                                                         | 1                                                                                                                          | 1                                                                                                                    | 2                                                                                                         | 2                                                                                                         | 1                                                                                                                        | 2          |
|                                                                    |                                                                                                                                                       | 11/12/2013    | 11/4/2013         | 4                                                                                                        | 4                                                                                                     | 2                                                                                                                        | 2                                                                                                                          | 2                                                                                                                         | 2                                                                                                                          | 3                                                                                                                    | 2                                                                                                         | 1                                                                                                         | 1                                                                                                                        | 2          |
