# Supplementary material for: Learning Evaluation: blending quality improvement and implementation research methods to study healthcare innovations
Source: Springer Nature journal article supplement (doi:10.1186/s13012-015-0219-z), 2015-03-09
Supplement: MOESM5 [file 9772970]

## Appendix B – Example of an ACT Reach Reporter

**START HERE**

**Step 1**

What is the total number of active patients in your practice for the period from 11/15/2011 through 11/14/2012 ?

**Step 2**

What percent of your active patients (from Step 1) are...

Enter values as percents **without** the percent symbol. (e.g., 99.0 for 99.0%).

| Male | Female | Age 0-17 | 18-20 | 21-44 | 45-64 | 65+ | Private insurance | Medicare | Medicaid | Uninsured | Other | African American or Black | American Indian or Alaska Native | Asian | Hispanic or Latino | White | Other | Unknown race/ethnicity |
|------|--------|----------|-------|-------|-------|-----|-------------------|----------|----------|-----------|-------|---------------------------|----------------------------------|-------|--------------------|-------|-------|------------------------|
| 1.01 | 98.99  |          |       |       |       |     |                   |          |          |           |       |                           |                                  |       |                    |       |       |                        |

**Step 3** PLEASE CONTACT THE EVALUATION TEAM TO AFFIRM OR CORRECT THE TARGET POPULATION DESCRIPTION BELOW.

Briefly describe the target population for your ACT innovation.

All adult patients seen in your practice (18 years and over)

**Step 4** PLEASE CONTACT THE EVALUATION TEAM TO AFFIRM OR CORRECT THE SCREENING STRATEGY DESCRIPTION BELOW.

List or briefly describe the screening strategies (e.g., PHQ-9, GAD-7, AUDIT, chronic illness diagnosis) used with the above target population as part of your ACT innovation.

PHQ9, AUDIT, BMI, HbA1c - These were selected based on the risk stratification table provided by you to the evaluation team

Go to **Step 5** on next tab, "B. ACT Reach Counts"
