# Supplementary material for: Learning Evaluation: blending quality improvement and implementation research methods to study healthcare innovations
Source: Springer Nature journal article supplement (doi:10.1186/s13012-015-0219-z), 2015-03-09
Supplement: MOESM7 [file 9772970]

**Appendix G - Types of Integration Models observed in ACT**

|                                                  | Bidirectional        | Behavioral Health in Primary Care |                      |                      |                      |                      |                      |                      |                      | Primary Care in Behavioral Health |                      |
|--------------------------------------------------|----------------------|-----------------------------------|----------------------|----------------------|----------------------|----------------------|----------------------|----------------------|----------------------|-----------------------------------|----------------------|
| Characteristics / Practice ID                    | 1                    | 2                                 | 3                    | 4                    | 5                    | 6                    | 7                    | 8                    | 9                    | 10                                | 11                   |
| <b>Breadth and depth of Integration Reach</b>    |                      |                                   |                      |                      |                      |                      |                      |                      |                      |                                   |                      |
| Identification of Problem                        | Systematic screening | Systematic Screening              | Systematic Screening | Systematic Screening | Clinician Discretion | Clinician Discretion | Clinician Discretion | Clinician Discretion | Systematic Screening | Systematic Screening              | Clinician Discretion |
| Provision of Services                            | Limited              | Broad                             | Limited              | Limited              | Limited              | Limited              | Limited              | Limited              | Limited              | Limited                           | Limited              |
| <b>Relevant Workforce Located in Practice</b>    |                      |                                   |                      |                      |                      |                      |                      |                      |                      |                                   |                      |
| Primary care team in practice                    | Yes                  | Yes                               | Yes                  | Yes                  | Yes                  | Yes                  | Yes                  | Yes                  | Yes                  | Yes                               | Yes                  |
| Embedded BHC on primary care team                | Yes                  | Yes                               | No                   | No                   | Yes                  | Yes                  | No                   | Yes                  | Yes                  | No                                | No                   |
| Consulting Psychiatrist in practice              | Yes                  | No                                | No                   | No                   | No                   | No                   | In system            | In system            | In system            | In system                         | No*                  |
| <b>Approach to transitioning patients to BHC</b> |                      |                                   |                      |                      |                      |                      |                      |                      |                      |                                   |                      |
| Warm hand-off                                    |                      | X                                 |                      |                      |                      | X                    |                      | X                    |                      |                                   |                      |
| Referral                                         | X                    |                                   | X                    | X                    | X                    |                      | X                    |                      | X                    | X                                 | X                    |
| <b>Path identified for Other Services</b>        |                      |                                   |                      |                      |                      |                      |                      |                      |                      |                                   |                      |
| Specialty MH                                     | co-located           | Referral                          | Referral             | No Path              | Referral             | Referral             | In system            | In system            | In system            | In house                          | co-located           |
| Substance Use                                    | In house             | Referral                          | Referral             | Limited              | Referral             | Referral             | In system            | In system            | In system            | In house                          | co-located           |
| <b>Shared Mental Model for Integration</b>       |                      |                                   |                      |                      |                      |                      |                      |                      |                      |                                   |                      |
| Yes                                              |                      | X                                 |                      |                      |                      |                      | X                    |                      |                      | X                                 | X                    |
| No                                               | X                    |                                   | X                    | X                    | X                    | X                    |                      | X                    | X                    |                                   |                      |
| <b>Improvements in patient outcomes</b>          |                      |                                   |                      |                      |                      |                      |                      |                      |                      |                                   |                      |
| Yes                                              |                      |                                   |                      |                      |                      |                      |                      |                      |                      |                                   |                      |
| No                                               |                      |                                   |                      |                      |                      |                      |                      |                      |                      |                                   |                      |

\* Use medication management experts

BHC - Behavioral Health Clinician

MH - Mental health
